# Supplementary material
Source: PubMed Central journal article supplement (PMC3381775)
Supplement: supp_111758_opioids-rocker-1-at.pdf [file supp_111758_opioids-rocker-1-at.pdf]

|                                                                |                              |                                  |
|----------------------------------------------------------------|------------------------------|----------------------------------|
| Opioid for Dyspnea<br>Post Opioid Experience Study (G. Rocker) | <b>ELIGIBILITY CHECKLIST</b> | Study/ Log ID Number: _ _ -- _ _ |
|----------------------------------------------------------------|------------------------------|----------------------------------|

**Please complete this form each time you assess a patient identified as potentially eligible/ suitable – (see Section C). For eligible patients who consent, assign a study number in sequence from the Eligible Patients Enrolled on Study log sheet. For ineligible patients or eligible patients who do not consent, assign a number in sequence from the Ineligible/ No Consent Patients log sheet (30 series). Ensure also that a family caregiver ID # (either eligible/ consenting – 50 series, or ineligible/ no consent – 80 series) is assigned on page 2 as applicable to all caregivers potentially able and available to participate who are assessed/ approached for consent to the study.**

**Section A – Inclusion Criteria** Patient’s Primary Diagnosis **must** be COPD:

|                                                                                                                                                                                                                                                                                                                                                                                                                      |                                                                                             |                                                                                                                                                                                                           |
|----------------------------------------------------------------------------------------------------------------------------------------------------------------------------------------------------------------------------------------------------------------------------------------------------------------------------------------------------------------------------------------------------------------------|---------------------------------------------------------------------------------------------|-----------------------------------------------------------------------------------------------------------------------------------------------------------------------------------------------------------|
| <input type="checkbox"/>                                                                                                                                                                                                                                                                                                                                                                                             | <b>1. Age &gt; 55 and Chronic Obstructive Pulmonary Disease (COPD) – Severe or Moderate</b> | Eligible                                                                                                                                                                                                  |
| Severe – <i>one or more of:</i><br>➤ severe SOB resulting in the patient being too breathless to leave the house .....<br>➤ breathlessness after dressing/ undressing (MRC 5).....<br>➤ chronic respiratory failure (PaCO <sub>2</sub> > 45).....<br>➤ clinical signs of right heart failure.....                                                                                                                    |                                                                                             | (√) one or more:<br>..... <input type="checkbox"/><br>..... <input type="checkbox"/><br>..... <input type="checkbox"/>                                                                                    |
| <i>OR</i>                                                                                                                                                                                                                                                                                                                                                                                                            |                                                                                             |                                                                                                                                                                                                           |
| Moderate –<br>➤ SOB such that patient has to stop walking after 100 metres or a few minutes on ground level (MRC 3-4).....<br>AND -- <i>one or more of:</i><br>➤ acute exacerbation of COPD requiring hospital admission within the last year .....<br>➤ ICU admission.....<br>➤ forced expiratory volume in 1 sec ≤ 30% predicted.....<br>➤ BMI <21.....<br>AND --<br>➤ MRC 4 patients with baseline CRQ-D score >5 |                                                                                             | (√)<br>..... <input type="checkbox"/><br>AND one or more:<br>..... <input type="checkbox"/><br>..... <input type="checkbox"/><br>..... <input type="checkbox"/><br>AND:<br>..... <input type="checkbox"/> |
| ➤ Primary reason for opioid prescription is for the treatment of dyspnea? .....                                                                                                                                                                                                                                                                                                                                      |                                                                                             | (√)<br>..... <input type="checkbox"/>                                                                                                                                                                     |

**Section B – Exclusion Criteria** Circle Yes or No beside each of the criteria to determine if excluded. If eligible, continue completing checklist. If excluded, assign a 30-sequence ID number and skip to Section C if a family caregiver is available to approach.

|                                                                                |                                 |                                 |
|--------------------------------------------------------------------------------|---------------------------------|---------------------------------|
|                                                                                |                                 | Eligible                        |
| ➤ Acute exacerbation of COPD in the past month? .....                          | YES (excluded) or NO (eligible) | (√)<br><input type="checkbox"/> |
| ➤ patient is not able to communicate in English or French.....                 | YES (excluded) or NO (eligible) | <input type="checkbox"/>        |
| ➤ LOC is impaired due to medications, coma, encephalopathy, etc.....           | YES (excluded) or NO (eligible) |                                 |
| ➤ Patient has overlap syndrome (i.e. COPD and sleep disordered breathing)..... | YES (excluded) or NO (eligible) |                                 |

**Section C – Suitability Assessment** Check (√) to confirm study suitability has been confirmed.

|                                                                                                                                                                                                                                                                                                                                                                                                                                                                                                                           |                                                                                 |                                                                                                 |
|---------------------------------------------------------------------------------------------------------------------------------------------------------------------------------------------------------------------------------------------------------------------------------------------------------------------------------------------------------------------------------------------------------------------------------------------------------------------------------------------------------------------------|---------------------------------------------------------------------------------|-------------------------------------------------------------------------------------------------|
| Patient has been <i>assessed and deemed suitable</i> by: (√) one<br>❖ attending physician ..... <input type="checkbox"/><br>❖ bedside nurse..... <input type="checkbox"/><br>❖ case manager..... <input type="checkbox"/><br>❖ other (specify): ..... <input type="checkbox"/><br>and <u>confirmed by research coordinator</u> to be a suitable candidate for the study.....<br>..... <input type="checkbox"/><br>Cognitive abilities, physical stamina, psychological state indicate patient able to tolerate interview. | (√)<br><br>..... <input type="checkbox"/><br><br>..... <input type="checkbox"/> | Eligible<br><br>(√)<br><br>..... <input type="checkbox"/><br><br>..... <input type="checkbox"/> |
|---------------------------------------------------------------------------------------------------------------------------------------------------------------------------------------------------------------------------------------------------------------------------------------------------------------------------------------------------------------------------------------------------------------------------------------------------------------------------------------------------------------------------|---------------------------------------------------------------------------------|-------------------------------------------------------------------------------------------------|

**Section D – Informed Consent** *If patient meets all above eligibility criteria*, request study consent.

|                                                                                                                                                                                                                                                                                                                                                                                                                                                                                                                                                                                                                                                                                                                                                                                                                                                                                                                                                                                                                                              |                                           |                                                           |
|----------------------------------------------------------------------------------------------------------------------------------------------------------------------------------------------------------------------------------------------------------------------------------------------------------------------------------------------------------------------------------------------------------------------------------------------------------------------------------------------------------------------------------------------------------------------------------------------------------------------------------------------------------------------------------------------------------------------------------------------------------------------------------------------------------------------------------------------------------------------------------------------------------------------------------------------------------------------------------------------------------------------------------------------|-------------------------------------------|-----------------------------------------------------------|
| Informed consent has been obtained --> Yes -- Date signed: _____<br>No ( <i>explain</i> ): _____<br><br>Please complete for eligible consenting patients:<br>➤ patient has identified a potentially eligible/ available family caregiver (eligible family caregivers and those individuals who are unpaid and are involved to the greatest degree in caring for the patient in his/her home for ≥ 5 hours/week ..... )<br>( <i>If No, explain:</i> _____ )<br><br>Please complete for eligible consenting patients and also patients excluded/ not suitable:<br>➤ family caregiver has been <u>approached</u> re participation.....<br>( <i>If No, explain:</i> _____ )<br><br>➤ family caregiver has agreed to study and signed consent form.....<br>Date signed: _____<br><br>NB: All family caregivers <u>approached</u> re participation will have a study number assigned.<br>Family caregiver Study/ Log ID Number: _____ -- _____<br><br>Eligible/ consenting caregiver: 50 series #<br>No consent/ ineligible caregiver: 80 series # | (√)<br><br>..... <input type="checkbox"/> | Eligible<br><br>(√)<br><br>..... <input type="checkbox"/> |
| ... Circle: Yes or No or N/A<br><br>... Circle: Yes or No or N/A<br><br>... Circle: Yes or No or N/A<br><br>Comments :                                                                                                                                                                                                                                                                                                                                                                                                                                                                                                                                                                                                                                                                                                                                                                                                                                                                                                                       |                                           |                                                           |

**Section E – Identifying Information** Record below identifying information for eligible consenting patients.

|                                                                                                                                                                                            |                                                                                                                                                                                      |
|--------------------------------------------------------------------------------------------------------------------------------------------------------------------------------------------|--------------------------------------------------------------------------------------------------------------------------------------------------------------------------------------|
| Patient Initials: _____ -- _____ -- _____<br><div style="display: flex; justify-content: space-around; font-size: small;"> <span>First</span> <span>Middle</span> <span>Last</span> </div> | Date of Birth: _____ -- _____ -- _____<br><div style="display: flex; justify-content: space-around; font-size: small;"> <span>Year</span> <span>Month</span> <span>Day</span> </div> |
|--------------------------------------------------------------------------------------------------------------------------------------------------------------------------------------------|--------------------------------------------------------------------------------------------------------------------------------------------------------------------------------------|

Name of Research Coordinator: \_\_\_\_\_

Signature: \_\_\_\_\_ Date (Year/ Month/ Day): \_\_\_\_\_
